# Supplementary material
Source: PubMed Central journal article supplement (PMC9896402)
Supplement: EIJ-D-21-00581_Nardi_SD.pdf [file EIJ-D-21-00581_Nardi_SD.pdf]

## Supplementary data

**Supplementary Table 1. Valve-related characteristics.**

|                                          |                |
|------------------------------------------|----------------|
| Size of valve                            |                |
| - 20 mm                                  | 4 (4%)         |
| - 23 mm                                  | 18 (17%)       |
| - 25 mm                                  | 6 (5%)         |
| - 26 mm                                  | 17 (16%)       |
| - 27 mm                                  | 15 (14%)       |
| - 29 mm                                  | 33 (30%)       |
| - 34 mm                                  | 14 (13%)       |
| - n/a                                    | 1 (1%)         |
| Type of valve, n (%)                     |                |
| - SAPIEN 3 (Edwards)                     | 11 (10.2%)     |
| - SAPIEN 3 Ultra (Edwards)               | 23 (21.3%)     |
| - Evolut R (Medtronic)                   | 40 (37.0%)     |
| - Evolut PRO (Medtronic)                 | 2 (1.8%)       |
| - ACURATE <i>neo</i> (Boston Scientific) | 2 (1.8%)       |
| - ACURATE (Boston)                       | 5 (4.6%)       |
| - Portico (Abbott)                       | 24 (22.2%)     |
| - Myval (Meril)                          | 1 (0.9%)       |
| Balloon aortic valvuloplasty, n (%)      | 55 (50.9%)     |
| Valve post dilatation, n (%)             | 33 (30.6%)     |
| Post TAVI mean gradient, mmHg            | 7.0 (4.0-10.0) |
| Mean valve area, mm <sup>2</sup>         | 1.8 (1.7-2.1)  |

Values are % (n) or mean<sub>±</sub>SD or median+interquartile range.
